# Supplementary material for: Ice nucleation by combustion ash particles at conditions relevant to mixed-phase clouds
Source: Copernicus journal article supplement (doi:10.5194/acp-15-5195-2015), 2015-05-11
Supplement: Supplementary file 1 [file acp-15-5195-2015-supplement.pdf]

Supplement of Atmos. Chem. Phys., 15, 5195–5210, 2015  
<http://www.atmos-chem-phys.net/15/5195/2015/>  
doi:10.5194/acp-15-5195-2015-supplement  
© Author(s) 2015. CC Attribution 3.0 License.

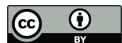

*Supplement of*

## **Ice nucleation by combustion ash particles at conditions relevant to mixed-phase clouds**

**N. S. Umo et al.**

*Correspondence to:* N. S. Umo (eensu@leeds.ac.uk) and B. J. Murray (b.j.murray@leeds.ac.uk)

The copyright of individual parts of the supplement might differ from the CC-BY 3.0 licence.

The following patterns are provided to support the information in the main article.

### 1.0 EDX charts for combustion ashes – wood, domestic, and coal bottom ashes.

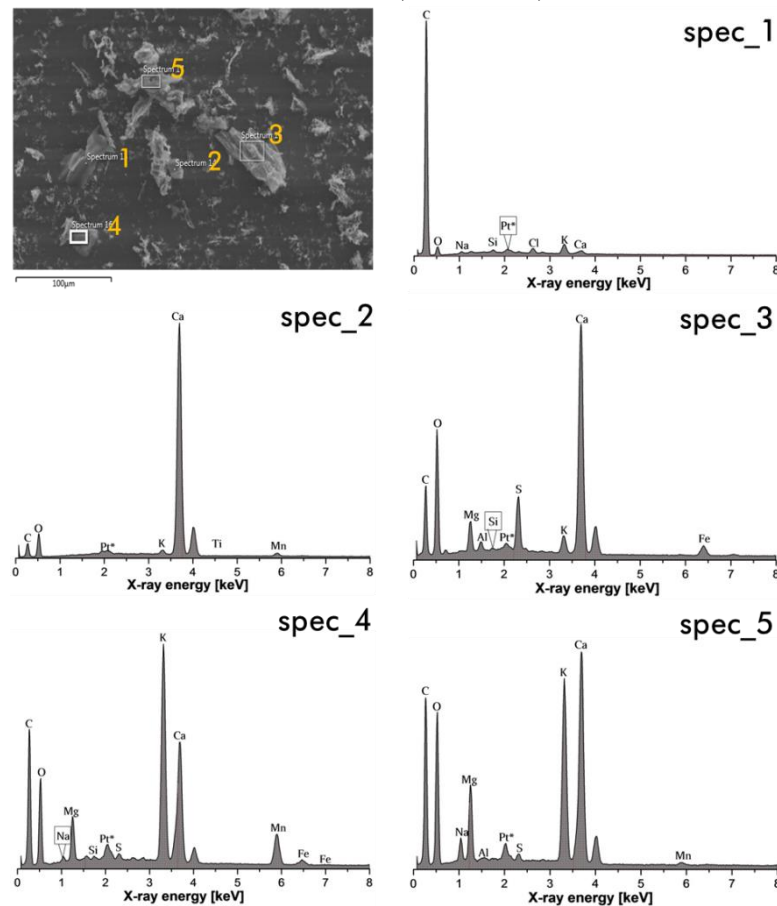

Figure 1

Figure 1: Elemental composition of wood bottom ash measured by energy dispersive X-ray spectroscopy (EDX) that was coupled to a scanning electron microscope (SEM). Platinum/Palladium (Pt/Pd) mixture was used to coat the samples before SEM/EDX spectra were taken; hence, it is asterisked on the spectra. These spectra were background corrected before making this plot. The ordinate (which is not shown) is intensity, in counts per second per energy unit ( $\text{cps eV}^{-1}$ ). The spectra labels (spec\_1, spec\_2, . . . , spec\_n) on the SEM images are the locations from which the EDX scanned.

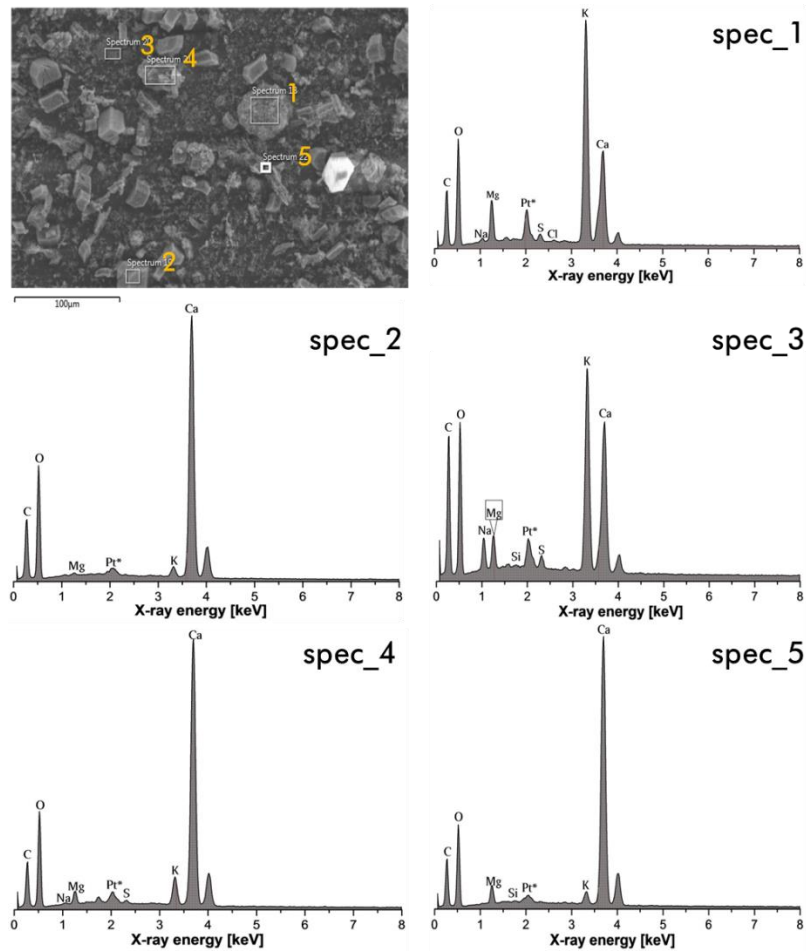

Figure 2: Elemental composition of domestic bottom ash measured by energy dispersive X-ray spectroscopy (EDX) that was coupled to a scanning electron microscope (SEM). Platinum/Palladium (Pt/Pd) mixture was used to coat the samples before SEM/EDX spectra were taken; hence, it is asterisked on the spectra. These spectra were background corrected before making this plot. The ordinate (which is not shown) is intensity, in counts per second per energy unit ( $\text{cps eV}^{-1}$ ). The spectra labels (spec\_1, spec\_2, . . . , spec\_n) on the SEM images are the locations from which the EDX scanned.

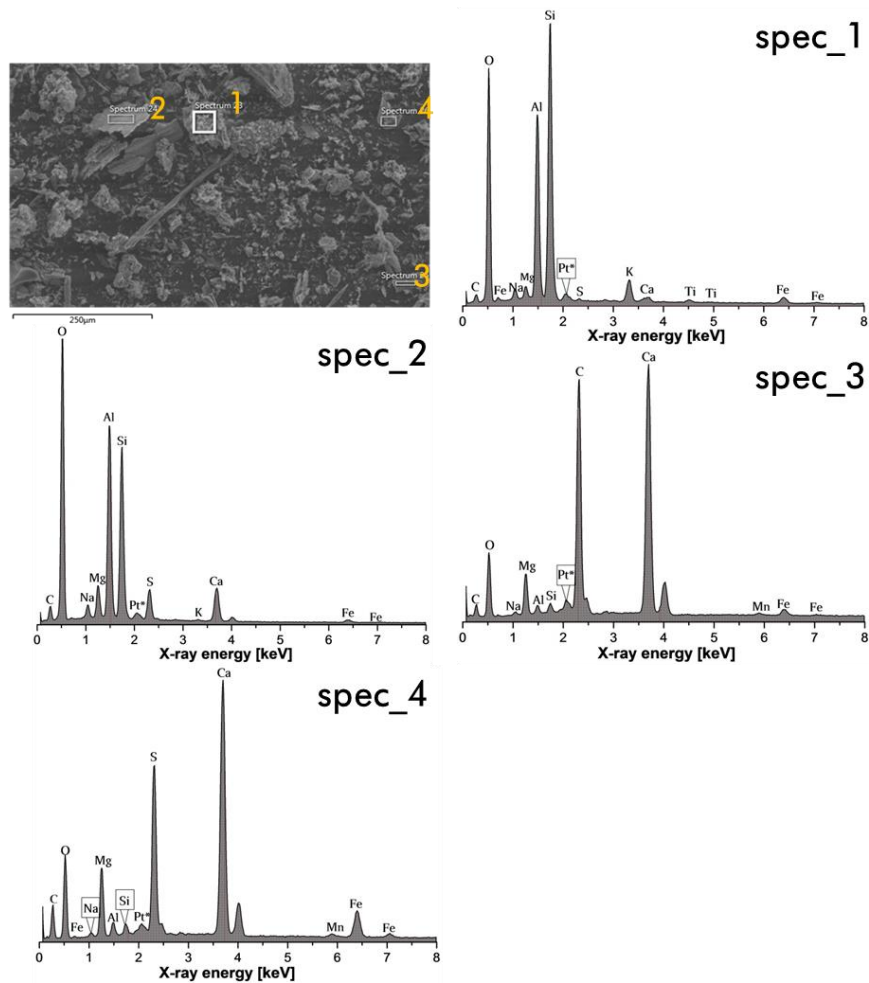

Figure 3: Elemental composition of coal bottom ash measured by energy dispersive X-ray spectroscopy (EDX) that was coupled to a scanning electron microscope (SEM). Platinum/Palladium (Pt/Pd) mixture was used to coat the samples before SEM/EDX spectra were taken; hence, it is asterisked on the spectra. These spectra were background corrected before making this plot. The ordinate (which is not shown) is intensity, in counts per second per energy unit ( $\text{cps eV}^{-1}$ ). The spectra labels (spec\_1, spec\_2, . . . , spec\_n) on the SEM images are the locations from which the EDX scanned.

## 2.0 X-ray diffraction patterns, fits and residuals for combustion ashes

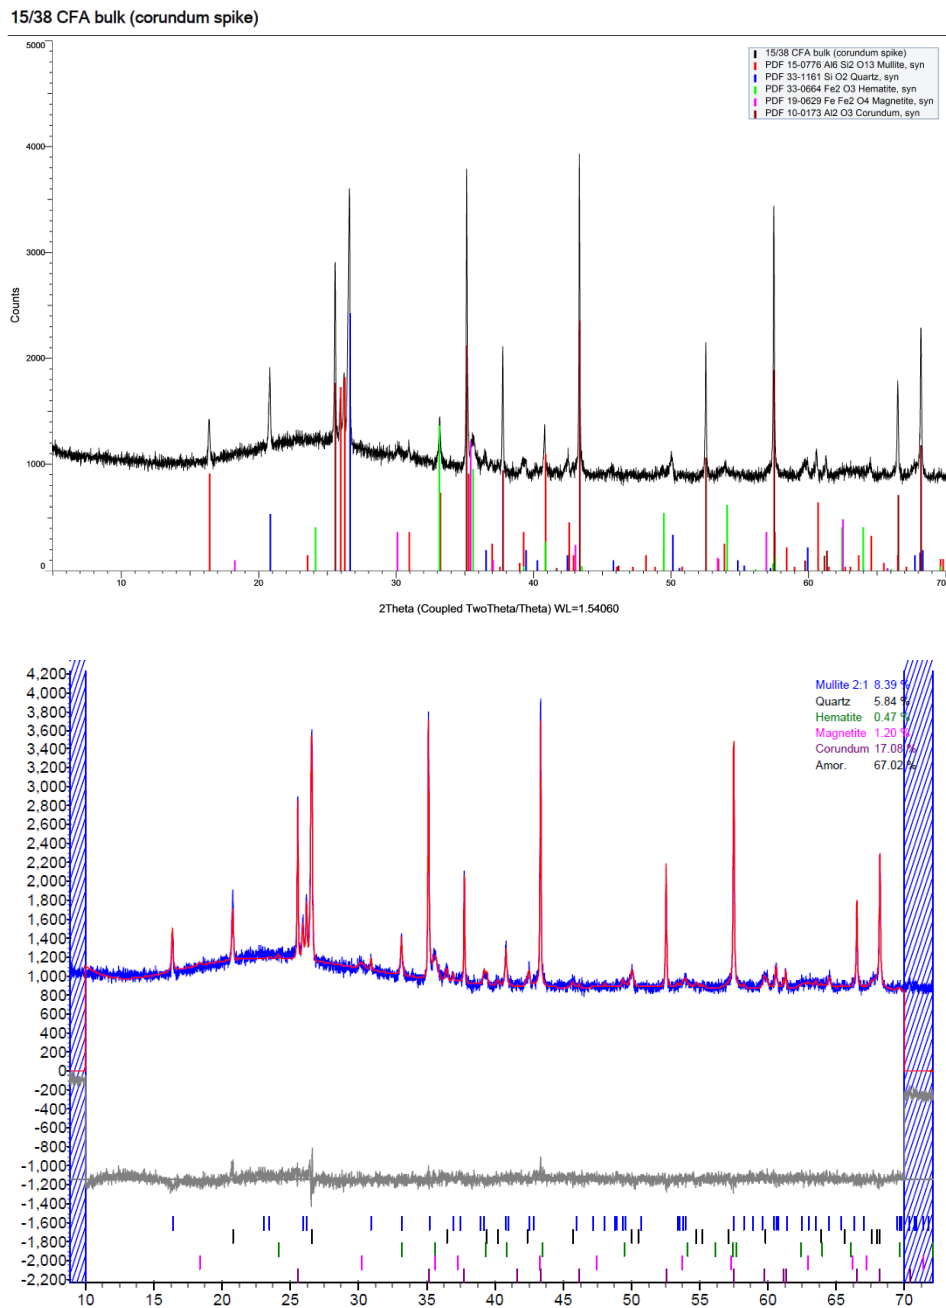

Figure 4: X-ray diffraction pattern of coal fly ash (bulk) for the qualitative and quantitative analyses of its mineral composition.

15/38 CFA sieved (corundum spike)

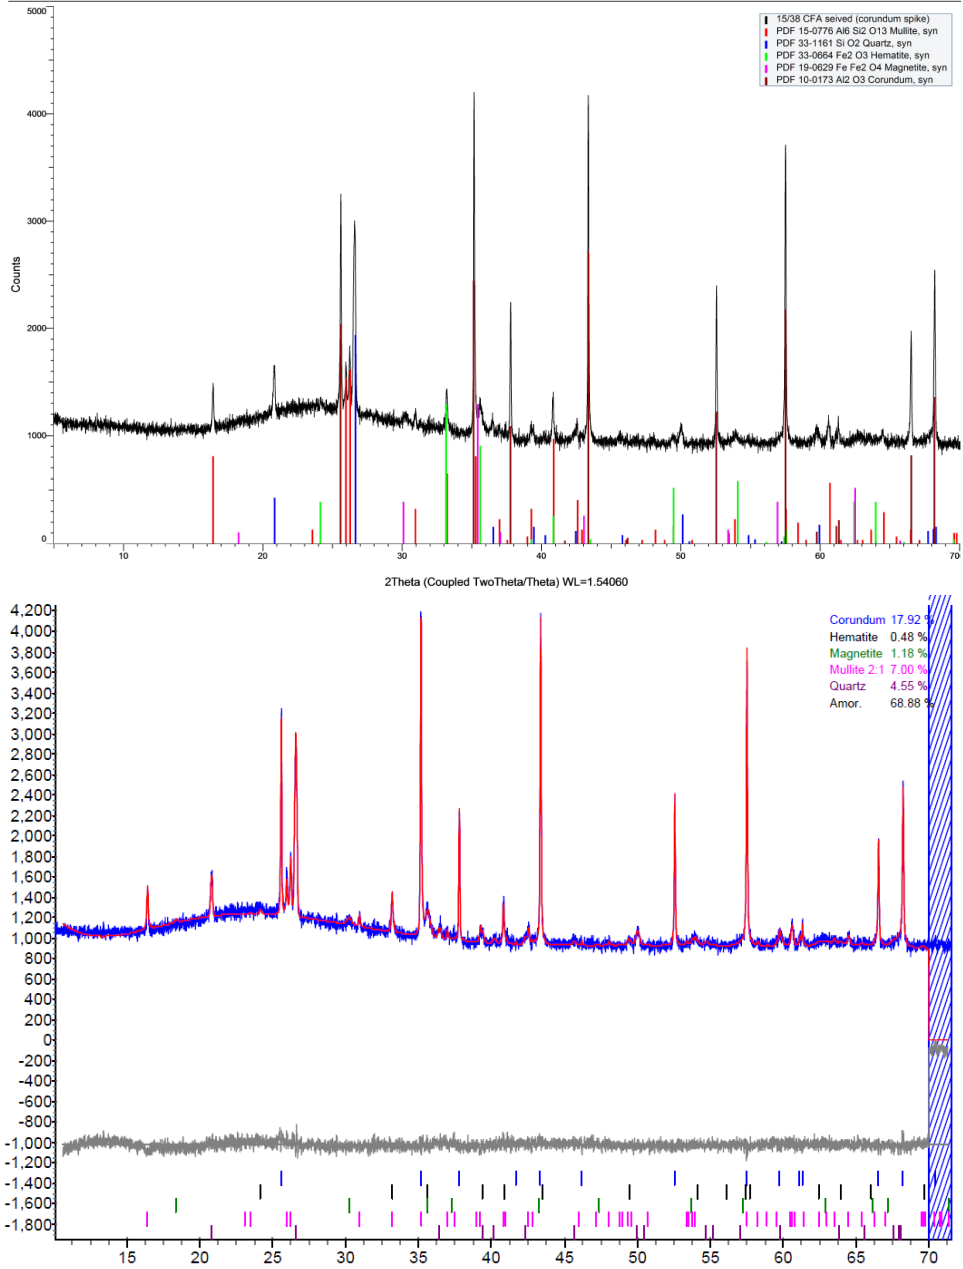

**Figure 5:** X-ray diffraction pattern of coal fly ash (sieved to  $\leq 40 \mu\text{m}$ ) for the qualitative and quantitative analyses of its mineral composition.

15/38 WCA (corundum spike)

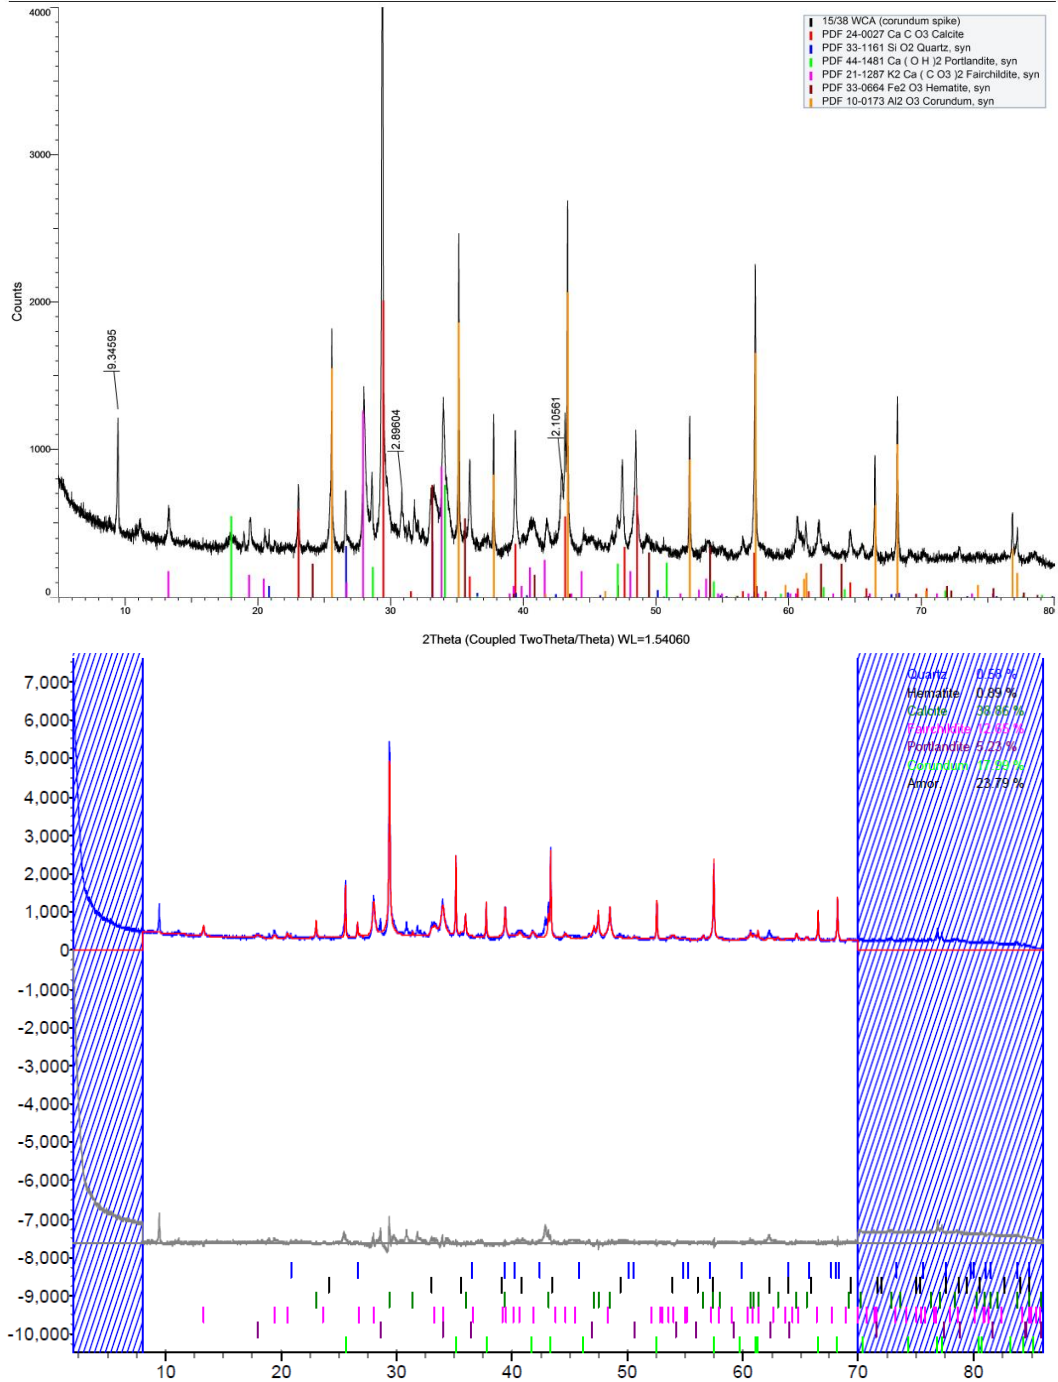

**Figure 6:** X-ray diffraction pattern of wood bottom ash (sieved to  $\leq 40 \mu\text{m}$ ) for the qualitative and quantitative analyses of its mineral composition.

15/38 BCA (corundum spike)

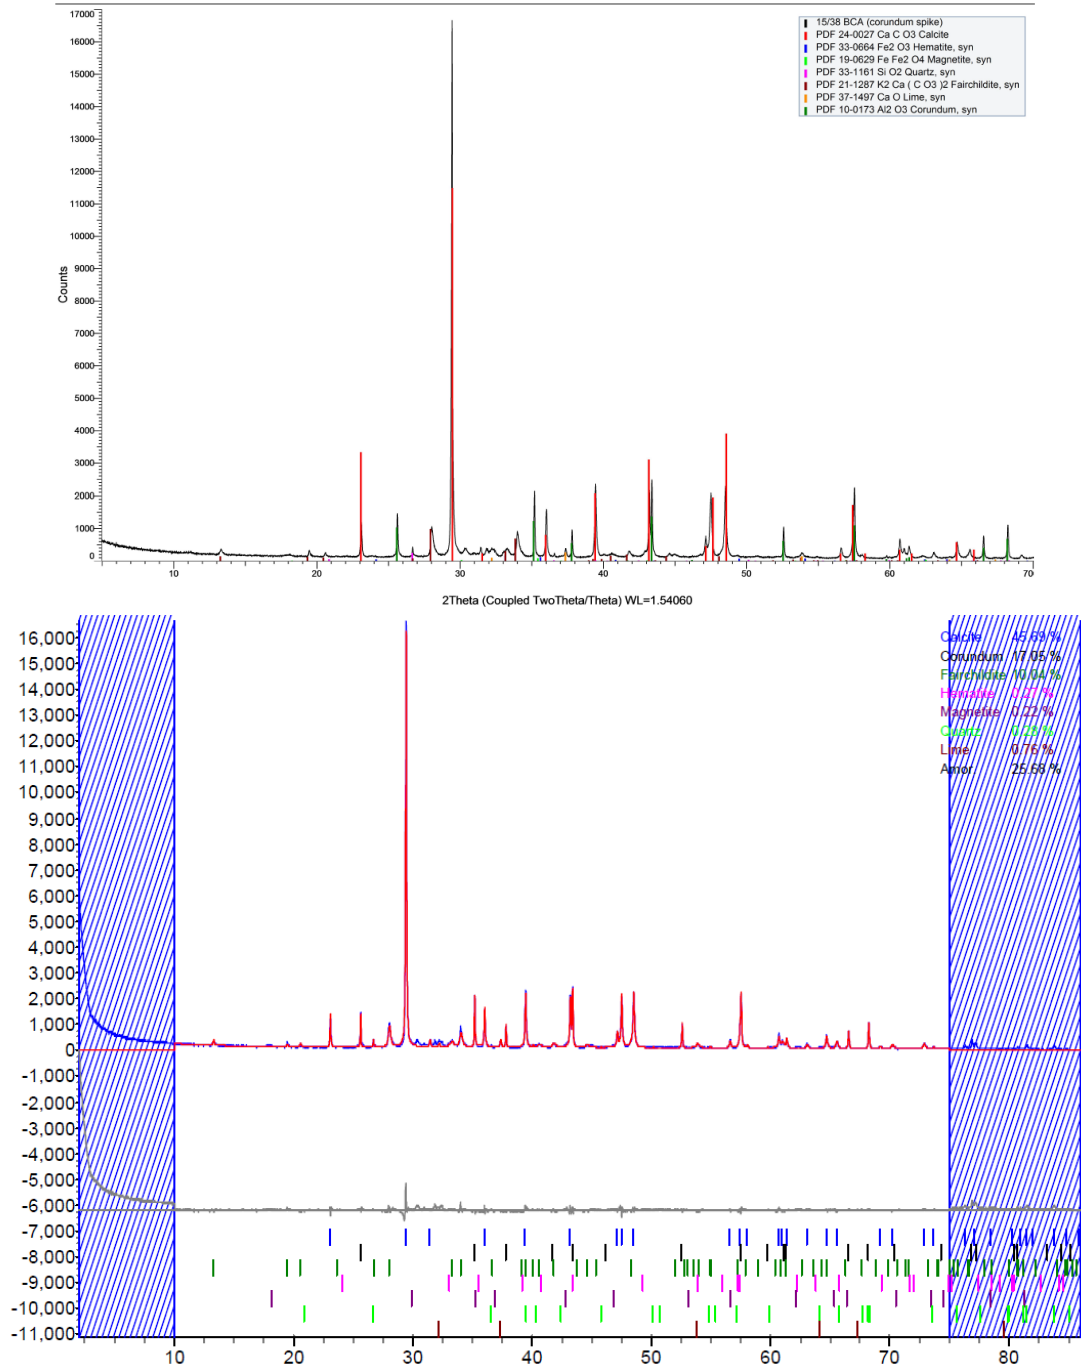

**Figure 7:** X-ray diffraction pattern of domestic bottom ash (sieved to  $\leq 40 \mu\text{m}$ ) for the qualitative and quantitative analyses of its mineral composition.



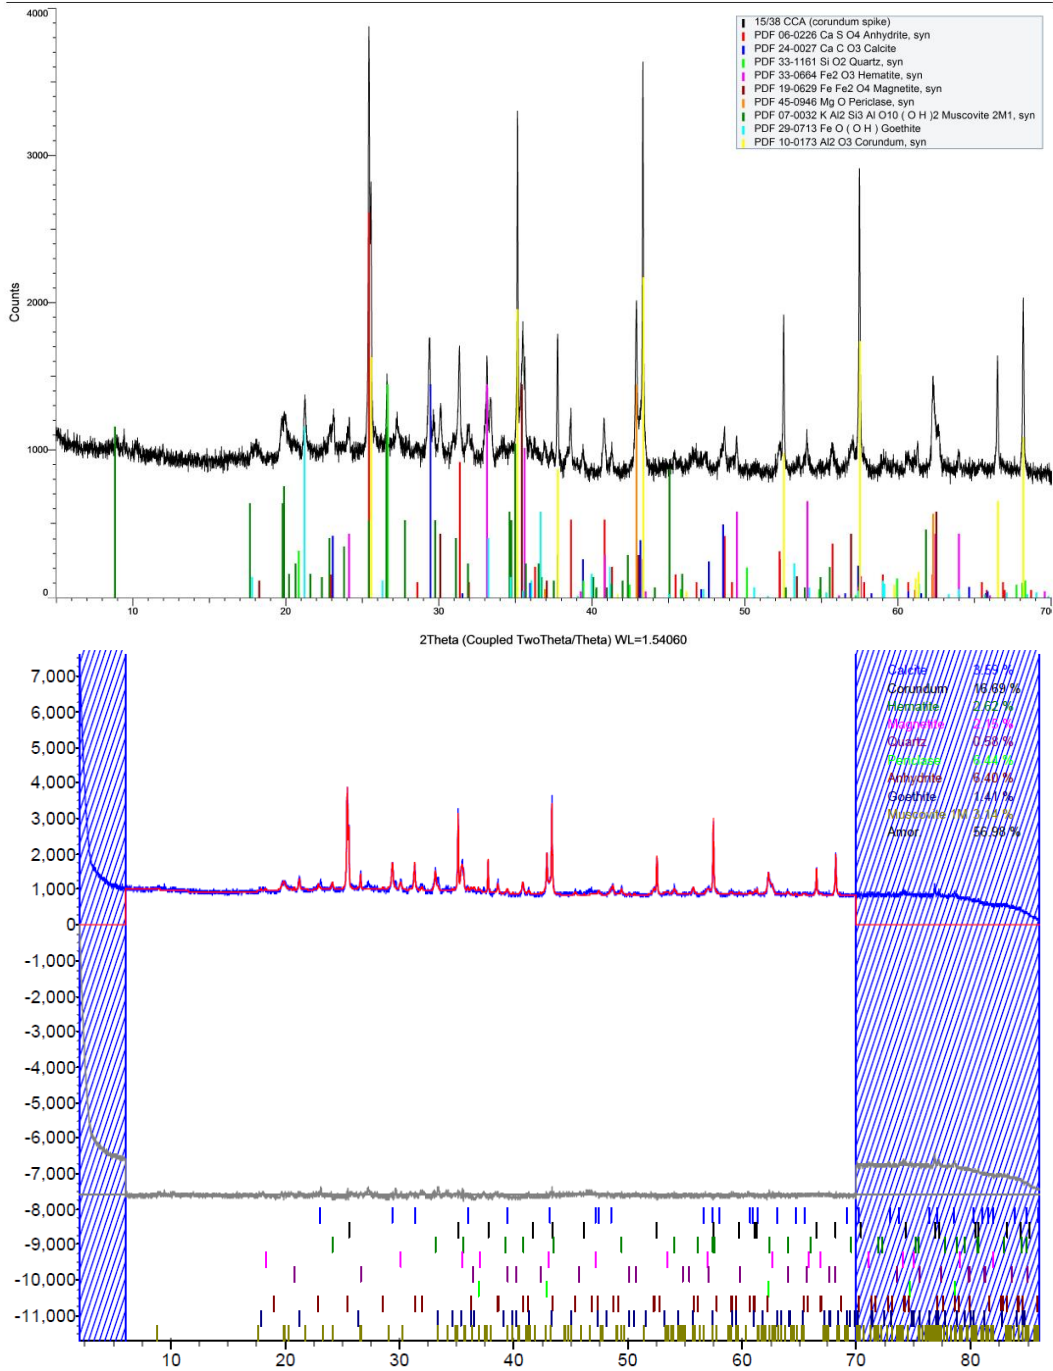

**Figure 8:** X-ray diffraction pattern of coal bottom ash (sieved to  $\leq 40 \mu\text{m}$ ) for the qualitative and quantitative analyses of its mineral composition.
